# Supplementary material for: Transcriptomic Analyses Reveal Leaf Colour Changes and L-theanine Accumulation in Variegated Tea
Source: Research Square preprint supplement (doi:10.21203/rs.3.rs-154065/v1), 2021-02-04
Supplement: Supplementary file 1 [file dfb9c9d8f0fdd14b1bbb67fc.docx]

Transcriptomic analyses reveal leaf colour changes and L-theanine accumulation in variegated tea

Nianci Xiea,b,1, Chenyu Zhanga,b, Pinqian Zhouc, Xizhi Gaoa, b, Shuanghong Tiand, Cui Lua, b, Kunbo Wang a,b**, Chengwen Shena,b*

# Additional files

Figures


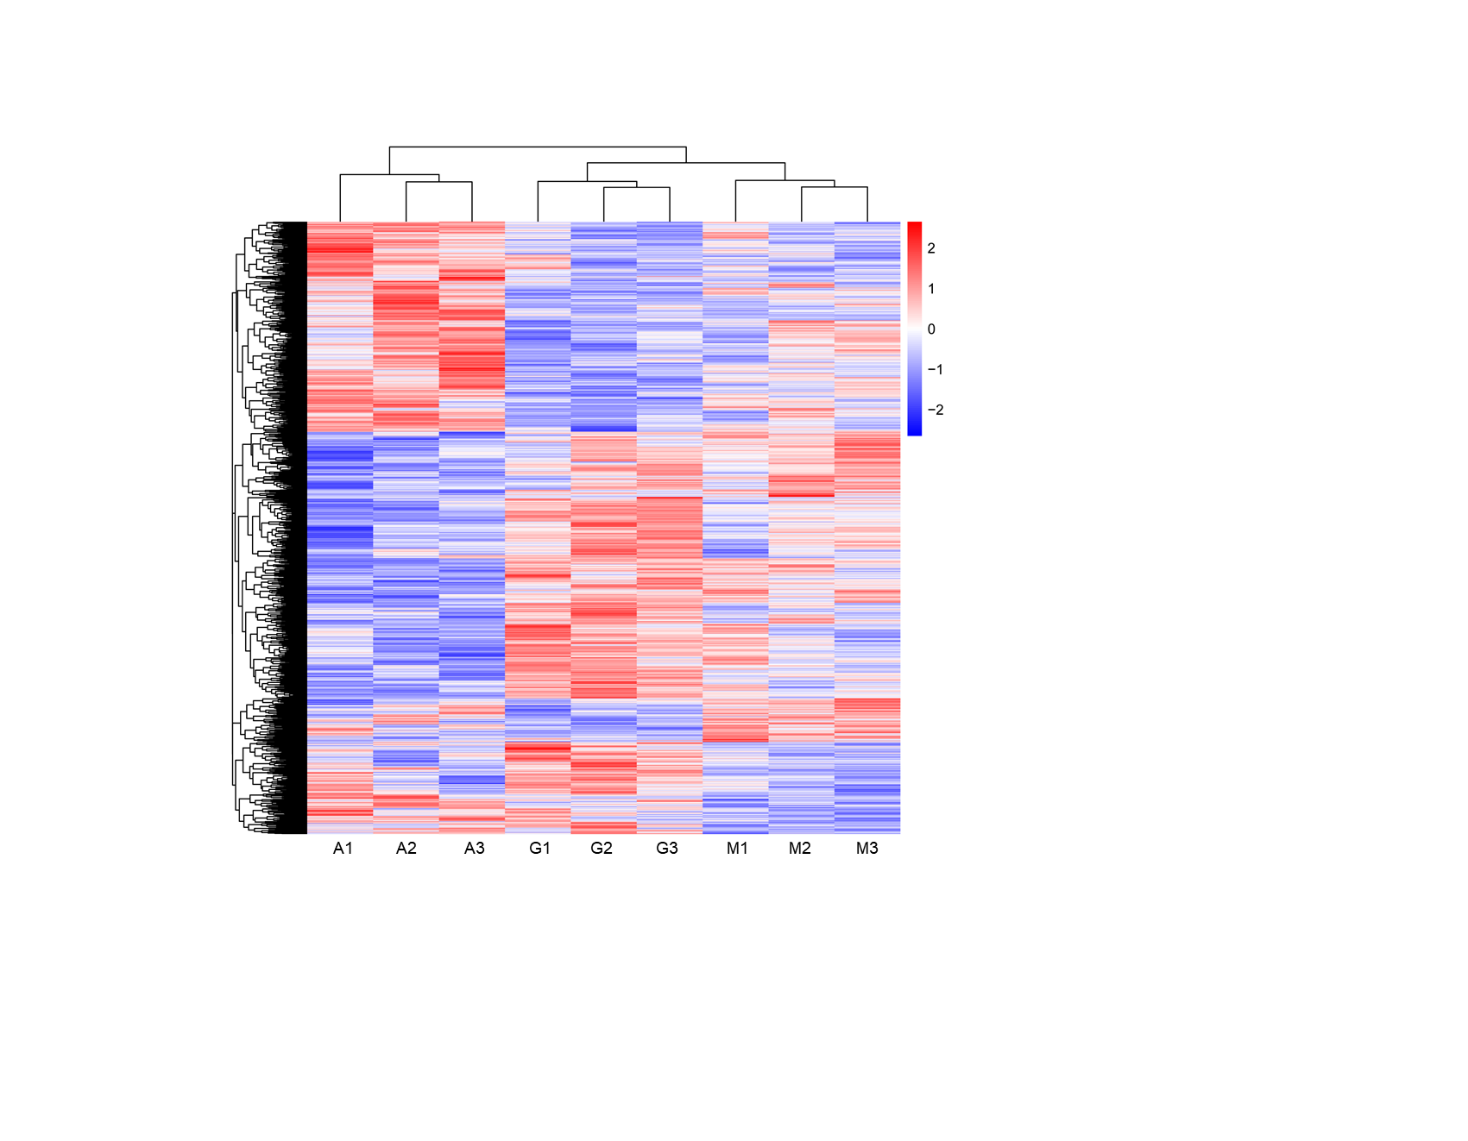


Figure S1 Differential gene cluster analysis diagram between samples. A, albino sector. M, mosaic sector. G, green sector.


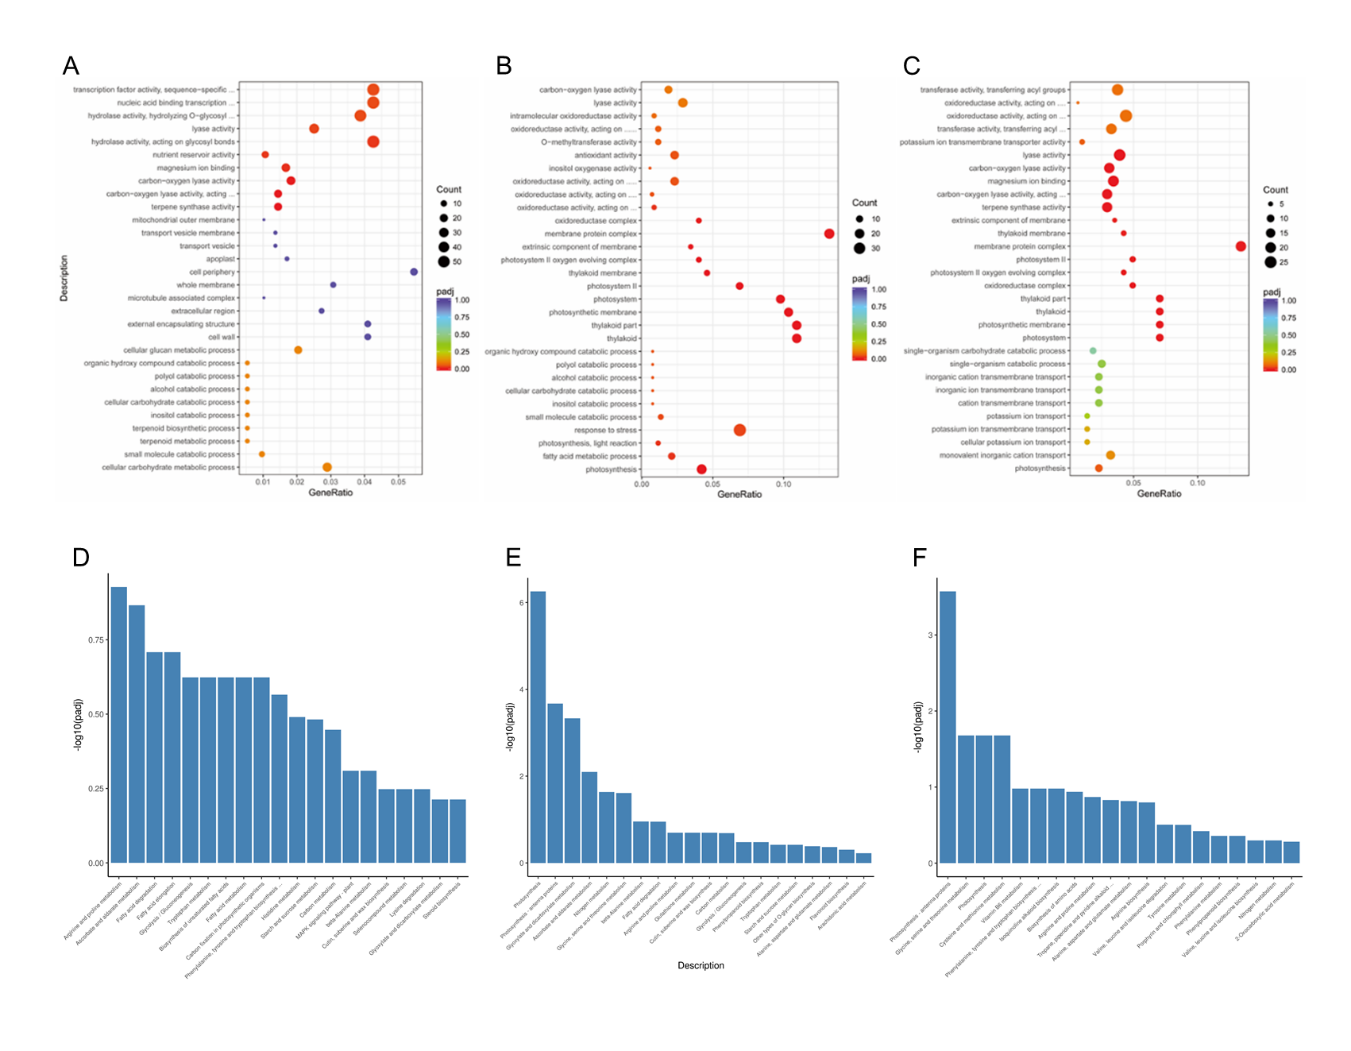


Figure S2 GO and KEGG enrichment analyses. A. GO annotation of significantly expressed DEGs in A comparing with G. B. GO annotation of significantly expressed DEGs in A comparing with M. C. GO annotation of significantly expressed DEGs in G comparing with M. D. The top 20 KEGG pathways A comparing with G. E. The top 20 KEGG pathways in A comparing with M. F. The top 20 KEGG pathways in G comparing with M.

Tables

| Compare | all | up | down |
| --- | --- | --- | --- |
| A vs G | 2760 | 1241 | 1519 |
| A vs M | 1484 | 676 | 808 |
| G vs M | 1283 | 829 | 454 |

Table S1 Statistics on the number of differential genes in different sectors. A, albino sector. M, mosaic sector. G, green sector. Criteria for screening differences is DESeq2 p-value<0.05 |log2FoldChange|>0.0

| Differential gene | Name | Sequences |
| --- | --- | --- |
| TEA023090 | F | GTAGCCGACAAAGCCAAAC |
| R | CCACGGACAGCATACTCAC |
| TEA031206 | F | CGTGGTGTCGTTTATGCC |
| R | GCTCCCCGTTTCTTCTTT |
| TEA014780 | F | CCTTCTGCATTCTCCATCC |
| R | ATCACGACACTGCCCTTTC |
| TEA030368 | F | ACCGGCAAGCAAGTCCCAT |
| R | CCCAGCAGTGTCCCAACCA |
| TEA000535 | F | ATACACTCTTTTTGTTTTCG |
| R | TCATTGACTTCTCATCCTTT |
| TEA028194 | F | GGATGCCACACCAATTACA |
| R | GATTAGCGACTCCCCAAGA |
| TEA025819 | F | GTGAGATGGAGGTTGGATA |
| R | AAAATGACGCTGAAAGAAT |
| TEA004352 | F | TCTTGGTGATGAGGTTTTTG |
| R | GCTCTCTTCTGGATTGCTTT |
| TEA032123 | F | CCATTCAGGAAGGGAAACAA |
| R | GCACCAGCCCCACAGTAGTA |
| TEA030284 | F | GCACCCAACTCCTCCTCAT |
| R | AGCCGACATAGCAATCCTG |
| TEA027540 | F | AAGGGACGATGAAAGATTG |
| R | CAGCACCTGAACTCACTAAAA |
| TEA019944 | F | GCGTGATTAGTGAAGGTTGT |
| R | CTTAGGGCATTTCTGAACC |
| TEA016942 | F | GTTGAGCAGTGTCGGAATA |
| R | CCAGGGTTCTTGATGTCTT |
| TEA015666 | F | GTGAAGAAATGGGCAAGTA |
| R | GACAATAGCAAGATGGGTT |
| TEA012203 | F | TTATCCCACAAGAAATCCC |
| R | TCTCCAAGCCCTCACTATC |
| TEA011847 | F | CACTCCCATCTCCGCTCAC |
| R | AACCCTCGCTCCTCTGCTT |
| Actin gene | actin-F | GGAGCTGAGAGATTCCGTTG |
| actin-R | GAACCACCACTGAGGACGAT |

Table S2 Sequences of differential gene primers
